# Supplementary material for: Efficient Single-Cell Transgene Induction in Caenorhabditis elegans Using a Pulsed Infrared Laser
Source: PubMed Central journal article supplement (PMC3789807; doi:10.1534/g3.113.007682), 2013-10-01
Supplement: supp_g3.113.007682_FigureS1.pdf [file supp_g3.113.007682_FigureS1.pdf]

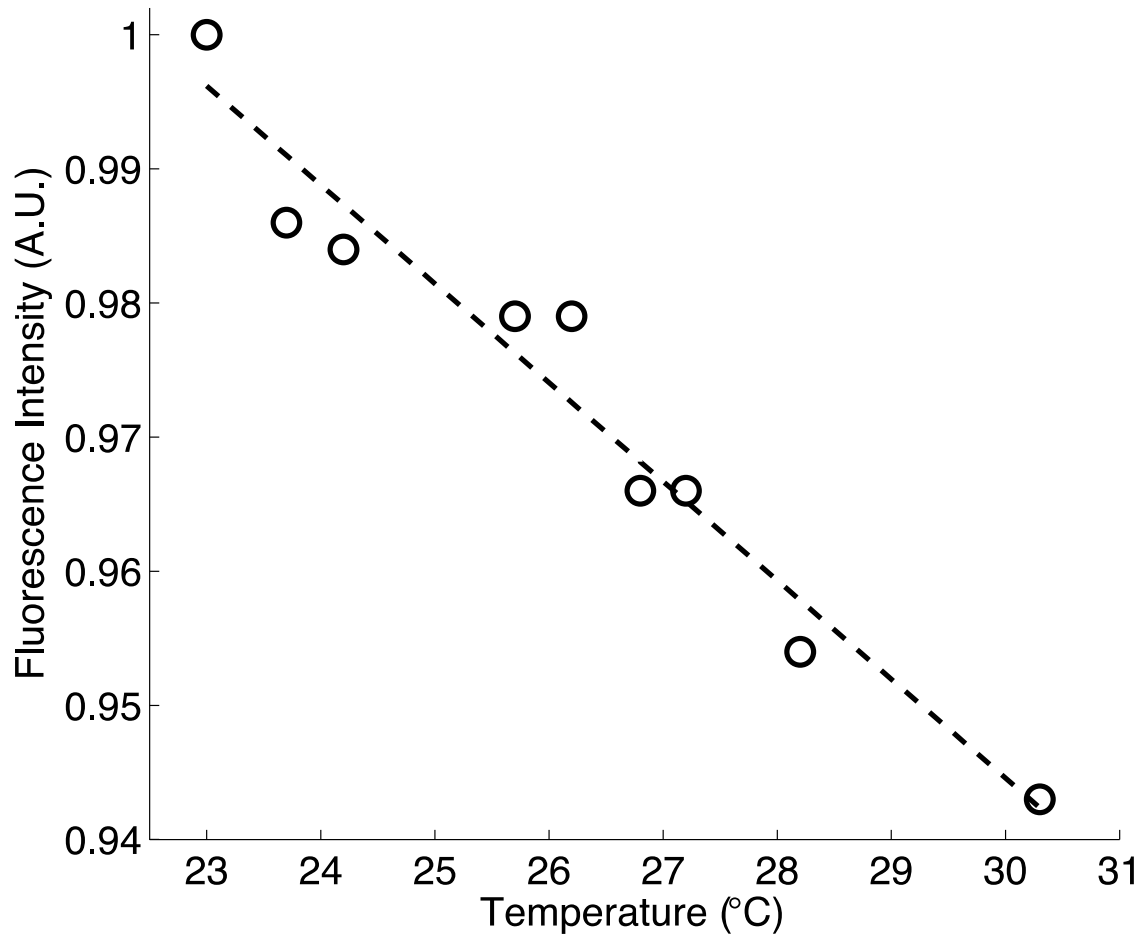

**Figure S1 Temperature Dependence of GFP-expressing *E. coli*.** Fluorescence intensity of GFP (solid black curve) expressed in *E. coli* measured on a thermo-controllable stage decreases linearly. In all calibration experiments we used the fit line,  $F$ , to convert changes in fluorescence intensity into temperature changes. The fit (dashed black curve) obeys  $f = -0.0079t + 1.18$ , where  $t$  is the temperature in °C and  $f$  is the fluorescence intensity relative to the fluorescence intensity at 23 °C. The fluorescence temperature dependence measured here is comparable to that previously described (Kamei et al. 2009).
