# Supplementary material for: Efficient Single-Cell Transgene Induction in Caenorhabditis elegans Using a Pulsed Infrared Laser
Source: PubMed Central journal article supplement (PMC3789807; doi:10.1534/g3.113.007682), 2013-10-01
Supplement: supp_g3.113.007682_FigureS5.pdf [file supp_g3.113.007682_FigureS5.pdf]

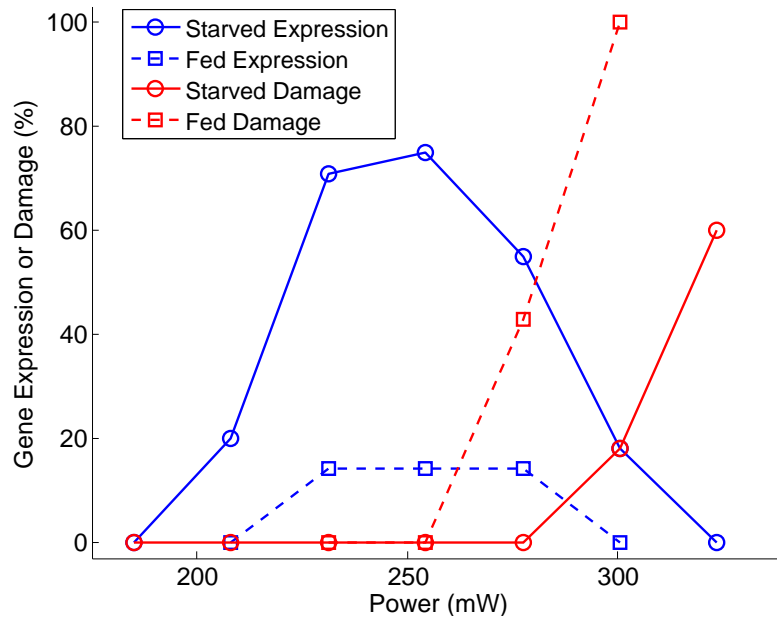

**Figure S5 Starvation Increases Probability of Single Cell Gene Expression and Increases Damage Threshold**

For a range of laser powers we measured GFP induction in seam cells for starved (solid blue curve) and well-fed (dashed blue curve) L4 animals. Starved animals exhibited a much higher rate of GFP induction. Additionally, the rate at which we observed damage seam cells after heat shock was different between starved (solid red curve) and well-fed (dashed red curve) L4 animals. The threshold at which damage became apparent was higher for starved animals than for well-fed animals.
