# Supplementary material for: Efficient Single-Cell Transgene Induction in Caenorhabditis elegans Using a Pulsed Infrared Laser
Source: PubMed Central journal article supplement (PMC3789807; doi:10.1534/g3.113.007682), 2013-10-01
Supplement: supp_g3.113.007682_FileS1.pdf [file supp_g3.113.007682_FileS1.pdf]

## File S1

### Equations describing heat transport during continuous-wave and pulsed laser illumination

#### Heat transport during continuous-wave and pulsed laser illumination

The dynamics of the temperature distribution is described by the heat equation with external input:

$$\rho c_p \frac{\partial T}{\partial t} = \kappa \nabla^2 T + P$$

Where  $\rho$  is the density,  $c_p$  is the specific heat,  $\kappa$  is the thermal conductivity, and  $P(r,t)$  is the heat power deposited by the laser. Suppose  $P=0$  outside a small radius  $r_0$ .

For **continuous-wave illumination**  $P$  is constant. At steady-state (time derivative of temperature is zero) we have

$$T(r, t) = T_0 + \frac{P}{4\pi\kappa r}$$

for  $r > r_0$ . Therefore the laser-induced temperature shift decreases as the inverse of the radius from the center of the heated region.

For **pulsed illumination**, an infinitely small and short pulse of heat creates a thermal distribution described by the fundamental solution

$$T(r, t) = T_0 + \frac{E}{4\pi\rho c_p(\alpha t)^{3/2}} e^{-r^2/4\alpha t}$$

where

$$\alpha = \frac{\kappa}{\rho c_p}$$

is the thermal diffusivity and  $E$  is the total energy deposited by the pulse:

$$E = \int_{\text{pulse}} P dt$$

Therefore in pulsed illumination the laser-induced temperature shift decreases exponentially with the square of the distance to the heat source.
