# Supplementary material for: Efficient Single-Cell Transgene Induction in Caenorhabditis elegans Using a Pulsed Infrared Laser
Source: PubMed Central journal article supplement (PMC3789807; doi:10.1534/g3.113.007682), 2013-10-01
Supplement: supp_g3.113.007682_TableS1.pdf [file supp_g3.113.007682_TableS1.pdf]

**Table S1 Gene expression rate for single neurons targeted during L2 stage**

| Cell Targeted | Single cell induction rate | Single cell + other cell induction rate |
|---------------|----------------------------|-----------------------------------------|
| ADL           | 9/30 (30%)                 | 12/30 (40%)                             |
| AWB           | 7/27 (25.9%)               | 10/27 (37%)                             |
| ALM           | 12/13 (92.3%)              | 0/13 (0%)                               |
