# Supplementary material for: Efficient Single-Cell Transgene Induction in Caenorhabditis elegans Using a Pulsed Infrared Laser
Source: PubMed Central journal article supplement (PMC3789807; doi:10.1534/g3.113.007682), 2013-10-01
Supplement: supp_g3.113.007682_TableS2.pdf [file supp_g3.113.007682_TableS2.pdf]

**Table S2** Gene expression and hatch rate for single cells targeted during four-cell stage

| Cell Targeted | GFP induction rate | Hatch rate    |
|---------------|--------------------|---------------|
| ABp           | 30/31 (96.8%)      | 23/31 (74.2%) |
| EMS           | 20/25 (80%)        | 23/25 (92.0%) |
| ABa           | 21/26 (80.8%)      | 20/26 (76.9%) |
| P2            | 7/27 (25.9%)       | 23/27 (85.2%) |
